# Supplementary material
Source: PubMed Central journal article supplement (PMC3319216)
Supplement: supp_jc.2011-1935_11-1935__Tab_1_Figs_1-2.pdf [file supp_jc.2011-1935_11-1935__Tab_1_Figs_1-2.pdf]

1 **SUPPLEMENTAL DATA**

2 Sequencing of the 12 exons of *CYP24A1* gene was performed using dye termination chemistry  
3 (Big Dye Terminator with a model 3730xl DNA sequencer; Applied Biosystems, CA). Primer  
4 sets for PCR were designed using a web-based design tool Primer3 (<http://frodo.wi.mit.edu>)  
5 (**Supplemental Table 1**). Intronic primers covering sequences of interest were designed at least  
6 30 bp away from the intron/exon boundaries. PCR was carried out using AmpliTaq Gold DNA  
7 Polymerase (Applied Biosystems) based on the standard protocol. After PCR, the amplicons  
8 were treated with the ExoSAP-IT (USB) to degrade unincorporated PCR primers and  
9 deoxynucleotide triphosphates. The treated products were mixed with 5 picomoles of the  
10 forward or reverse PCR primers for sequencing. DNA sequence variants were identified using  
11 Mutation Surveyor Analysis Software (Soft Genetics).

**Supplemental Table 1. Primers used to sequence the *CYP24A1* gene**

|                     | Forward Primer             |                     | Reverse Primer          |
|---------------------|----------------------------|---------------------|-------------------------|
| CYP24A1 Exon1_1_f   | AGGGCATGCTCTGTCTCC         | CYP24A1 Exon1_1_r   | AAGGCAGGAGGATGGGG       |
| CYP24A1 Exon1_2_f   | CCCTCTTTGCTTCCTTTTCC       | CYP24A1 Exon1_2_r   | ATGTCGGGGAGGGTTTG       |
| CYP24A1 Exon2_f     | GAGGAAGGAGGCGGGAG          | CYP24A1 Exon2_r     | CCGTCAGGCTCATCAGGTC     |
| CYP24A1 Exon3_f     | GCTGGAGTATTTCTGCATCTCC     | CYP24A1 Exon3_r     | CCACCAATATCCCTATGTCCC   |
| CYP24A1 Exon4_f     | ATGCGATGTAGCAAGACCTG       | CYP24A1 Exon4_r     | TGCCTGTTTACAAAAGAGTTGTC |
| CYP24A1 Exon5_f     | GGCATAGAATTGAGTCTTTAATAACC | CYP24A1 Exon5_r     | TGGGAATCACTGTGAAGTTCTG  |
| CYP24A1 Exon6_f     | CCTCTTCCAGAACGAACATTG      | CYP24A1 Exon6_r     | TGAAGCTCCAGACACGGG      |
| CYP24A1 Exon7_f     | TGCAAGAAGGAGTTTGGACTG      | CYP24A1 Exon7_r     | TGAATCCCAGTGAAATGAATG   |
| CYP24A1 Exon8_f     | TTGCAGAATAAGGTGGTGGG       | CYP24A1 Exon8_r     | TAATTAGCTAGGGGAAGCCG    |
| CYP24A1 Exon9_f     | AATCTGCATTCCCATTGACAC      | CYP24A1 Exon9_r     | CAAAGTCTAGGGAGATCTGGTG  |
| CYP24A1 Exon10-11_f | CAATTTTGCCATTCAAAGGTC      | CYP24A1 Exon10-11_r | GCTCATCCCTCGTCATTCTC    |
| CYP24A1 Exon12_1_f  | CCGGAAAGCAAACCTTCAAAC      | CYP24A1 Exon12_1_r  | AACAAAATAATGCCCCAGTG    |
| CYP24A1 Exon12_2_f  | GCTGGGAGTAATACTGACAATCC    | CYP24A1 Exon12_2_r  | TATTGCATGCATTTCTGTGC    |
| CYP24A1 Exon12_3_f  | TTAGGATCTGTGGTGCAGGG       | CYP24A1 Exon12_3_r  | TTTGTGATATAGGGCTTGTAGGC |

**Supplemental Figure 1.** Transmission of *CYP24A1* mutations in the affected family. Solid squares or circles indicate a clinical phenotype with biochemical abnormalities; shaded squares or circles represent at biochemical phenotype without reported clinical findings.

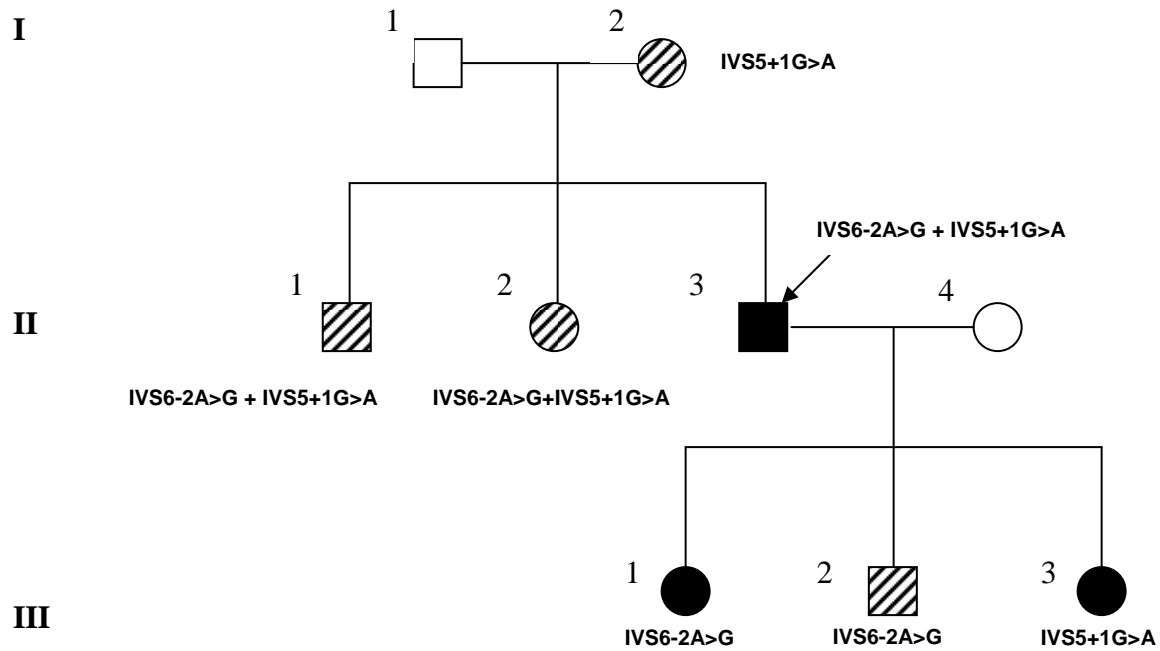

Supplemental Figure 2: Splice site mutations observed in affected family (*CYP 24A1*, NG\_008334.1)

**Splice Site Mutation 1: IVS5+1G>A**

```

      13236                               14415
      EXON5 end↓begin ..... ivs5 ..... end↓begin EXON6
ATCATGGCCATCAAAACAgtaagcag-----cagATGATGAGCACG  Genomic DNA
      a
IleMetAlaIleLysThr-----MetMetSerThr  Translation
```

**Splice Site Mutation 2: IVS6-2A>G**

```

      14526                               16116
      EXON6 end↓begin ..... ivs6 ..... end↓begin EXON7
ACCATTTTCAAATCAGgtaa-----ctctaatagTCAAAGCTTGT  Genomic DNA
      g
ThrIlePheLysSerV-----alLysAlaCys  Translation
```
